# Supplementary material for: Predicting respiratory hospital admissions in young people with cerebral palsy
Source: PubMed Central journal article supplement — Arch Dis Child. 2018 Mar 19;103(12):1119–24. doi: 10.1136/archdischild-2017-314346 (PMC6287554; doi:10.1136/archdischild-2017-314346), 2018-03-19
Supplement: archdischild-2017-314346supp001.pdf [file archdischild-2017-314346supp001.pdf]

**Appendix:**

Predictor variables with their response options and codings

| Predictor variable                                                                                                                                                                                                             | Response options                                                                                                                                      | Coding                                                                                                                                                                                                                                                                                             |
|--------------------------------------------------------------------------------------------------------------------------------------------------------------------------------------------------------------------------------|-------------------------------------------------------------------------------------------------------------------------------------------------------|----------------------------------------------------------------------------------------------------------------------------------------------------------------------------------------------------------------------------------------------------------------------------------------------------|
| Method of nutritional intake                                                                                                                                                                                                   |                                                                                                                                                       | No to all (0)                                                                                                                                                                                                                                                                                      |
| Ever take:                                                                                                                                                                                                                     |                                                                                                                                                       | Yes to any (1)                                                                                                                                                                                                                                                                                     |
| <ul style="list-style-type: none"> <li>• food with modified texture (e.g., soft or puréed),</li> <li>• thickened or naturally thick drinks,</li> <li>• formula or liquids through a nasogastric or gastrostomy tube</li> </ul> | Yes, No                                                                                                                                               |                                                                                                                                                                                                                                                                                                    |
|                                                                                                                                                                                                                                | Yes, No                                                                                                                                               |                                                                                                                                                                                                                                                                                                    |
|                                                                                                                                                                                                                                | Yes, No                                                                                                                                               |                                                                                                                                                                                                                                                                                                    |
| Ever cough or choke on saliva                                                                                                                                                                                                  | Yes, No                                                                                                                                               | No (0) Yes (1)                                                                                                                                                                                                                                                                                     |
| Oropharyngeal dysphagia                                                                                                                                                                                                        | Yes, No                                                                                                                                               | Yes (1) if either Method of nutritional intake (1) or cough/choke on saliva (1)<br>No (0) if both Method of intake (0) and cough/choke on saliva (0)                                                                                                                                               |
| GMFCS                                                                                                                                                                                                                          | I, II, III, IV, V                                                                                                                                     | I (1) II (2) III (3) IV (4) V (5)                                                                                                                                                                                                                                                                  |
| Frequent respiratory symptoms:                                                                                                                                                                                                 | never (not at all), rarely (less than once a week), sometimes (at least once a week), often (every day), or almost always (many times a day or night) | Coughing was coded as never – sometimes (0) often – almost always (1). The other two questions were coded as never –rarely (0) sometimes – almost always (1). Questions were then summed to give number of frequent respiratory symptoms: none (0), 1 symptom (1), 2 symptoms (2), 3 symptoms (3). |
| (a) Frequency of coughing                                                                                                                                                                                                      |                                                                                                                                                       |                                                                                                                                                                                                                                                                                                    |
| (b) Frequency of sounding chesty or phlegmy                                                                                                                                                                                    |                                                                                                                                                       |                                                                                                                                                                                                                                                                                                    |
| (c) Frequency of sounding wheezy                                                                                                                                                                                               |                                                                                                                                                       |                                                                                                                                                                                                                                                                                                    |
| Frequency of snoring                                                                                                                                                                                                           | never (not at all), rarely (less than once a week), sometimes (at least once a week), often (every day), or almost always (many times a day or night) | Rarely (0) sometimes (1) often - almost always (2).                                                                                                                                                                                                                                                |

|                                                                                       |         |                                     |
|---------------------------------------------------------------------------------------|---------|-------------------------------------|
| (d) Respiratory symptoms<br>with meals                                                |         | No to all (0)<br>Yes to any (1)     |
| During or after eating,<br>drinking or feeds, ever:                                   |         |                                     |
| • have a gurgly voice,                                                                | Yes, No |                                     |
| • wheeze, cough, or sneeze,                                                           | Yes, No |                                     |
| • choke                                                                               | Yes, No |                                     |
| <hr/>                                                                                 |         |                                     |
| GERD                                                                                  |         | No to all (0)<br>Yes to any (1)     |
| • ever vomit or regurgitate<br>after eating drinking or<br>feeds                      | Yes, No |                                     |
| • ever been diagnosed with<br>gastric reflux                                          | Yes, No |                                     |
| • ever had any medications<br>for reflux (e.g., Losec,<br>Somac)                      | Yes, No |                                     |
| • ever had anti-reflux<br>surgery                                                     | Yes, No |                                     |
| <hr/>                                                                                 |         |                                     |
| Current seizures                                                                      | Yes, No | No (0) Yes (1)                      |
| <hr/>                                                                                 |         |                                     |
| Ever diagnosed with<br>scoliosis                                                      | Yes, No | No (0) Yes (1)                      |
| <hr/>                                                                                 |         |                                     |
| Current asthma                                                                        |         | No (0) Yes (1)                      |
| • Current asthma diagnosis                                                            | Yes, No |                                     |
| • Currently on any asthma<br>medications (e.g.,<br>Ventolin, Flixotide)               | Yes, No |                                     |
| <hr/>                                                                                 |         |                                     |
| Smoker in the household                                                               | Yes, No | No (0), Yes (1), Unsure/missing (2) |
| <hr/>                                                                                 |         |                                     |
| Respiratory hospitalization<br>in the year preceding the<br>survey (from linked data) | Yes, No | No (0), Yes (1)                     |
| <hr/>                                                                                 |         |                                     |

---

|                                                                                                               |         |                 |
|---------------------------------------------------------------------------------------------------------------|---------|-----------------|
| >1 course of antibiotics for<br>respiratory illness in the<br>year preceding the survey<br>(from survey data) | Yes, No | No (0), Yes (1) |
|---------------------------------------------------------------------------------------------------------------|---------|-----------------|

---
